# Supplementary material for: Secondary Metabolites from Aspergillus sparsus NBERC_28952 and Their Herbicidal Activities
Source: MDPI journal article supplement (doi:10.3390/plants12010203), 2023-01-03
Supplement: s1 [file s1]

## Supplementary information for

### Secondary metabolites from *Aspergillus sparsus* NBERC\_28952 and their herbicidal activities

Zhaoyuan Wu<sup>1,‡</sup>, Fang Liu<sup>1,‡</sup>, Shaoyong Ke<sup>1</sup>, Zhigang Zhang<sup>1</sup>, Hongtao Hu<sup>1</sup>, Wei Fang<sup>1</sup>,  
Shaoyujia Xiao<sup>2</sup>,Yani Zhang<sup>1</sup>, Yueying Wang<sup>1</sup>, and Kaimei Wang<sup>1,\*</sup>

<sup>1</sup> Hubei Biopesticide Engineering Research Centre, Hubei Academy of Agricultural Sciences, Wuhan 430064, P. R. China

<sup>2</sup> Department of Pharmacy, Medical College, Wuhan University of Science and Technology, Wuhan 430065, P. R. China

<sup>‡</sup> These authors contributed equally to this work.

\* Correspondence: kaimei.wang@nberc.com; Tel.: +86-27-59101928

Figure S1 Mass spectrum of compound **1** (determined as C<sub>23</sub>H<sub>30</sub>O<sub>5</sub> by HR-ESI-MS: *m/z* 387.2170, [M+H]<sup>+</sup>, calcd for C<sub>23</sub>H<sub>31</sub>NaO<sub>5</sub>, 387.2166)

Figure S2 <sup>1</sup>H-NMR spectrum of compound **1**

Figure S3 <sup>13</sup>C-NMR spectrum of compound **1**

Figure S4 <sup>1</sup>H-<sup>13</sup>C HSQC spectrum of compound **1**

Figure S5 <sup>1</sup>H-<sup>1</sup>H COSY spectrum of compound **1**

Figure S6 <sup>1</sup>H-<sup>13</sup>C HMBC spectrum of compound **1**

Figure S7 <sup>1</sup>H-<sup>1</sup>H NOESY spectrum of compound **1**

Figure S8 Mass spectrum of compound **2** (determined as C<sub>23</sub>H<sub>30</sub>O<sub>5</sub> by HR-ESI-MS: *m/z* 387.2163, [M+H]<sup>+</sup>, calcd for C<sub>23</sub>H<sub>31</sub>O<sub>5</sub>, 387.2166)

Figure S9 <sup>1</sup>H-NMR spectrum of compound **2**

Figure S10 <sup>13</sup>C-NMR spectrum of compound **2**

Figure S11 <sup>1</sup>H-<sup>13</sup>C HSQC spectrum of compound **2**

Figure S12 <sup>1</sup>H-<sup>1</sup>H COSY spectrum of compound **2**

Figure S13 <sup>1</sup>H-<sup>13</sup>C HMBC spectrum of compound **2**

Figure S14 <sup>1</sup>H-<sup>1</sup>H ROESY spectrum of compound **2**

Figure S15 Mass spectrum of compound **3** (determined as C<sub>23</sub>H<sub>30</sub>O<sub>5</sub> by HR-ESI-MS: *m/z* 387.2167, [M+H]<sup>+</sup>, calcd for C<sub>23</sub>H<sub>31</sub>O<sub>5</sub>, 387.2166)

Figure S16 <sup>1</sup>H-NMR spectrum of compound **3**

Figure S17 <sup>13</sup>C-NMR spectrum of compound **3**

Figure S18 <sup>1</sup>H-<sup>13</sup>C HSQC spectrum of compound **3**

Figure S19 <sup>1</sup>H-<sup>1</sup>H COSY spectrum of compound **3**

Figure S20 <sup>1</sup>H-<sup>13</sup>C HMBC spectrum of compound **3**

Figure S21 <sup>1</sup>H-<sup>1</sup>H ROESY spectrum of compound **3**

Figure S22 Mass spectrum of compound **4** (determined as C<sub>25</sub>H<sub>34</sub>O<sub>6</sub> by HR-ESI-MS: *m/z* 453.2255, [M+Na]<sup>+</sup>, calcd for C<sub>25</sub>H<sub>34</sub>NaO<sub>6</sub>, 453.2248)

Figure S23 <sup>1</sup>H-NMR spectrum of compound **4**

Figure S24 <sup>13</sup>C-NMR spectrum of compound **4**

Figure S25 <sup>1</sup>H-<sup>13</sup>C HSQC spectrum of compound **4**

Figure S26  $^1\text{H}$ - $^1\text{H}$  COSY spectrum of compound **4**

Figure S27  $^1\text{H}$ - $^{13}\text{C}$  HMBC spectrum of compound **4**

Figure S28  $^1\text{H}$ - $^1\text{H}$  ROESY spectrum of compound **4**

Figure S29 Mass spectrum of compound **5** (determined as  $\text{C}_{22}\text{H}_{26}\text{O}_5$  by HR-ESI-MS:  $m/z$  371.1857,  $[\text{M}+\text{Na}]^+$ , calcd for  $\text{C}_{22}\text{H}_{27}\text{O}_5$ , 371.1853)

Figure S30  $^1\text{H}$ -NMR spectrum of compound **5**

Figure S31  $^{13}\text{C}$ -NMR spectrum of compound **5**

Figure S32  $^1\text{H}$ - $^{13}\text{C}$  HSQC spectrum of compound **5**

Figure S33  $^1\text{H}$ - $^1\text{H}$  COSY spectrum of compound **5**

Figure S34  $^1\text{H}$ - $^{13}\text{C}$  HMBC spectrum of compound **5**

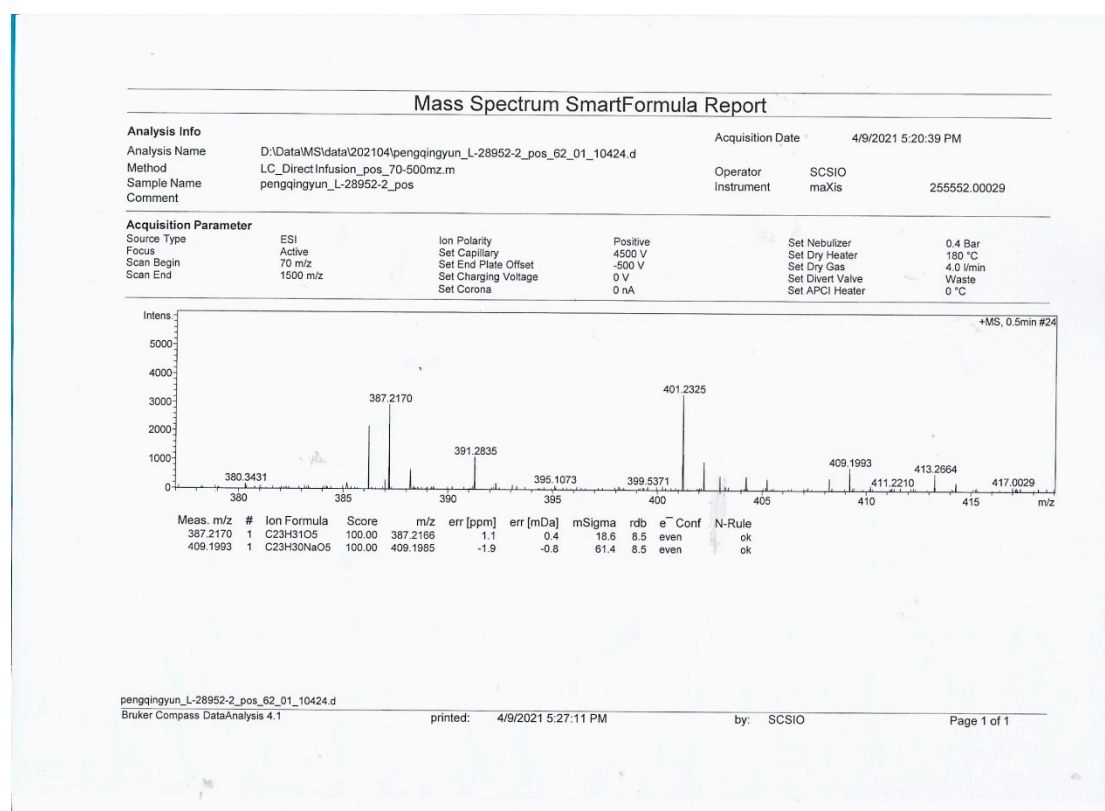

Figure S1 Mass spectrum of compound **1** (determined as  $\text{C}_{23}\text{H}_{30}\text{O}_5$  by HR-ESI-MS:  $m/z$  387.2170,  $[\text{M}+\text{H}]^+$ , calcd for  $\text{C}_{23}\text{H}_{31}\text{NaO}_5$ , 387.2166)

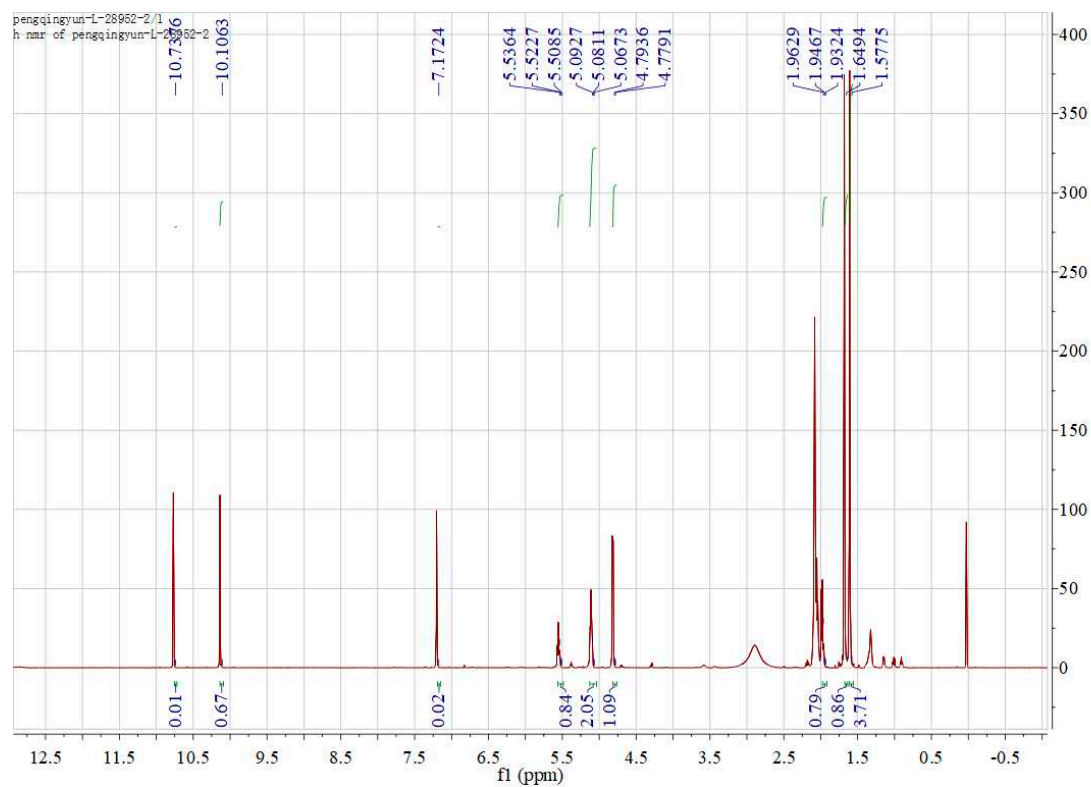

Figure S2  $^1\text{H}$ -NMR spectrum of compound **1**

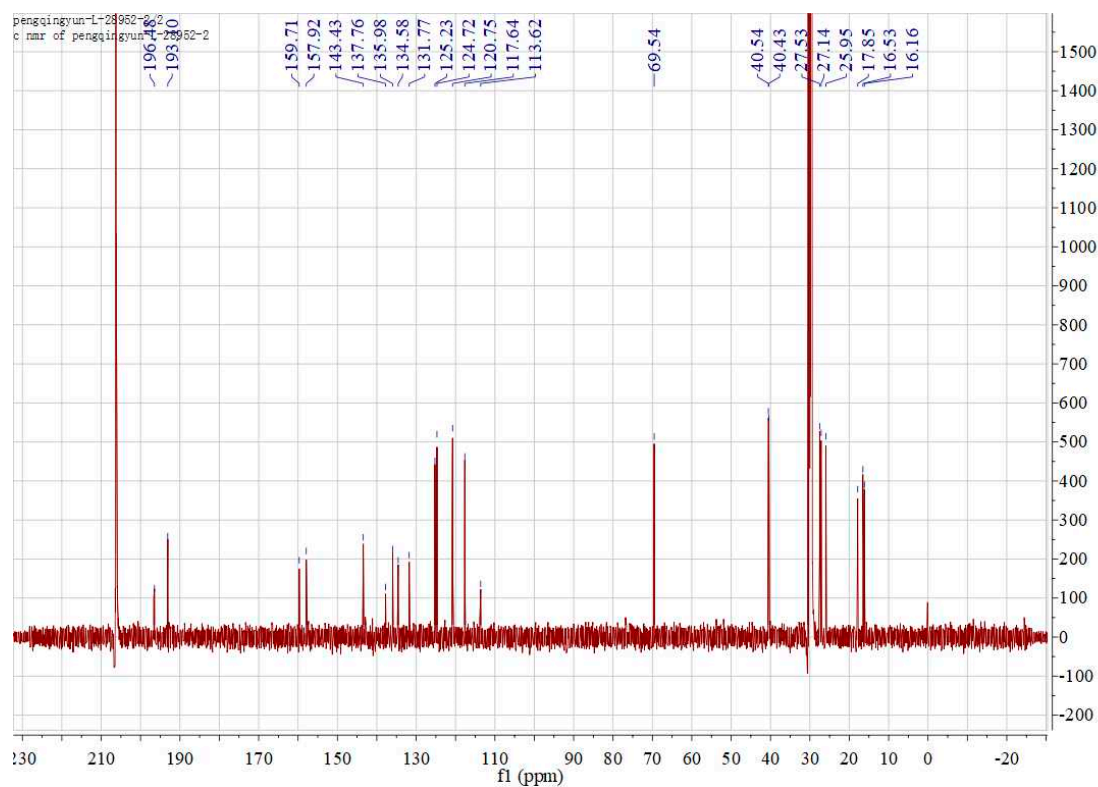

Figure S3  $^{13}\text{C}$ -NMR spectrum of compound **1**

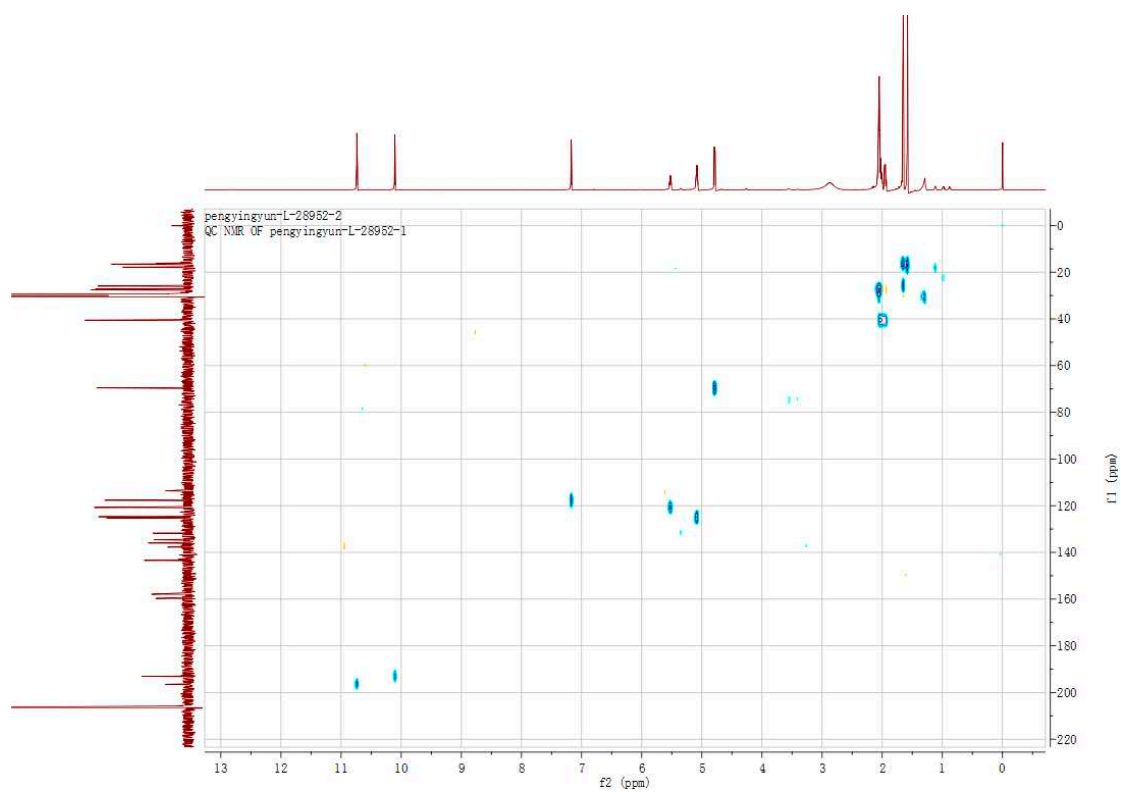

Figure S4 HSQC spectrum of compound **1**

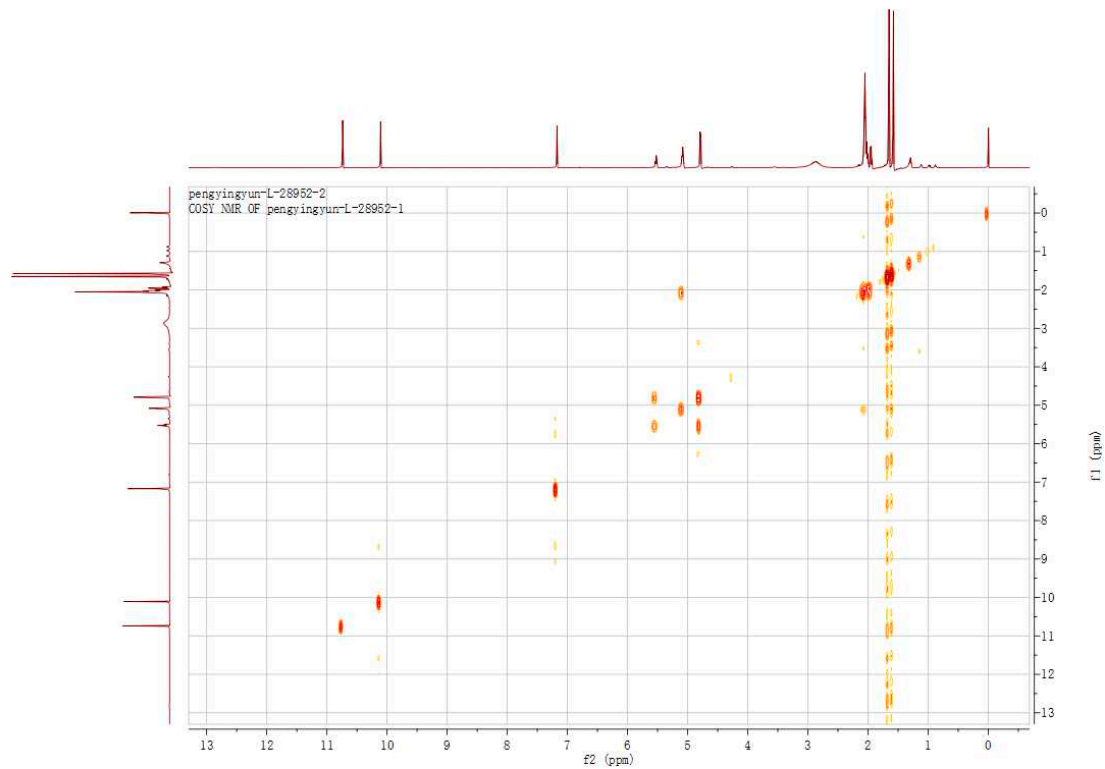

Figure S5  $^1\text{H}$ - $^1\text{H}$  COSY spectrum of compound **1**

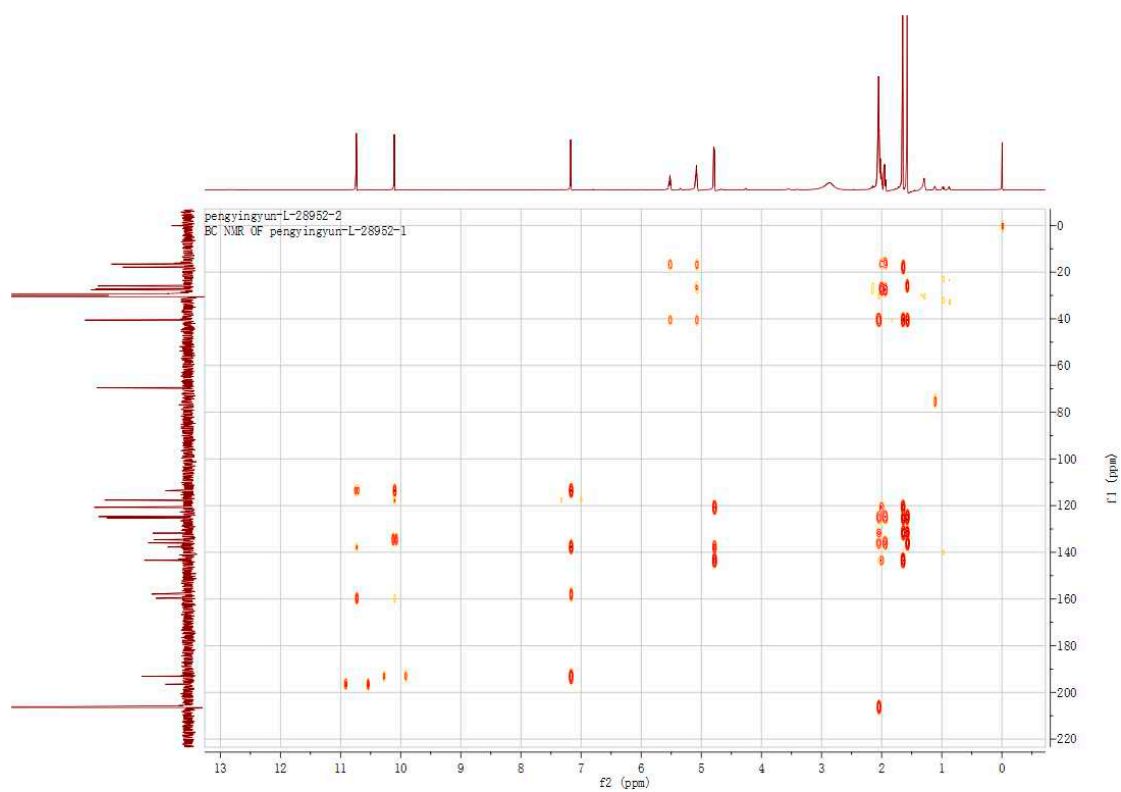

Figure S6  $^1\text{H}$ - $^{13}\text{C}$  HMBC spectrum of compound **1**

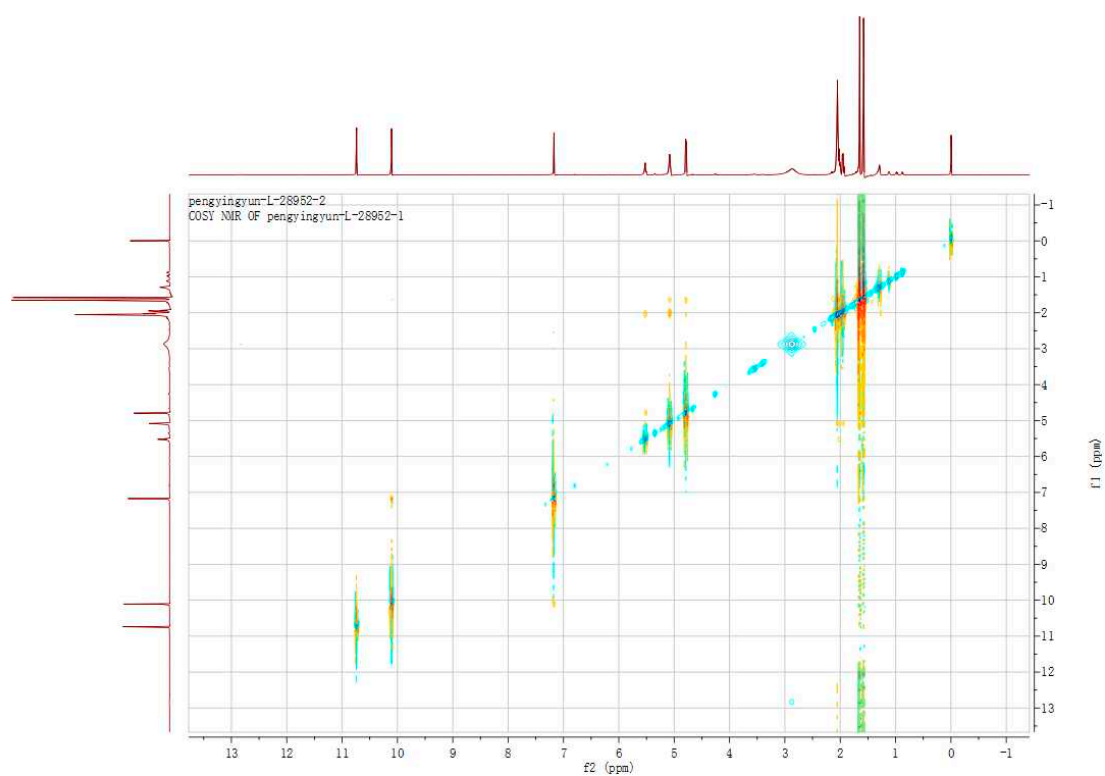

Figure S7  $^1\text{H}$ - $^1\text{H}$  NOESY spectrum of compound **1**

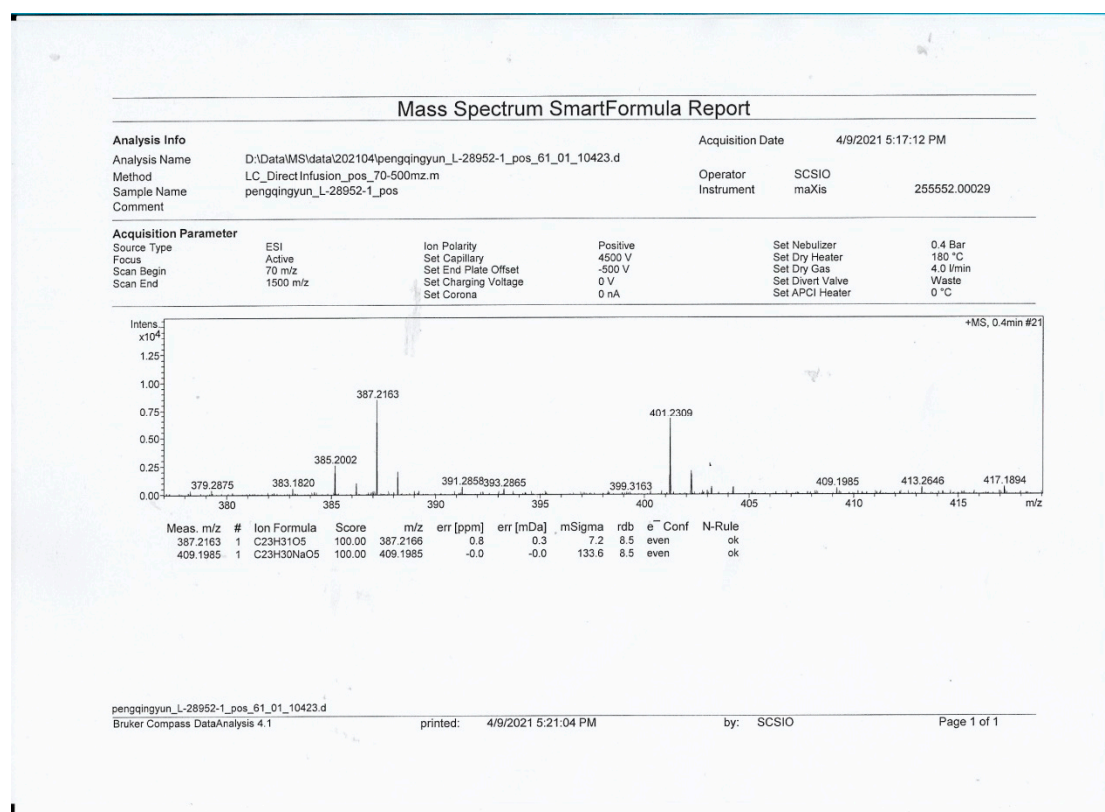

Figure S8 Mass spectrum of compound **2** (determined as C<sub>23</sub>H<sub>30</sub>O<sub>5</sub> by HR-ESI-MS:  $m/z$  387.2163, [M+H]<sup>+</sup>, calcd for C<sub>23</sub>H<sub>31</sub>O<sub>5</sub>, 387.2166)

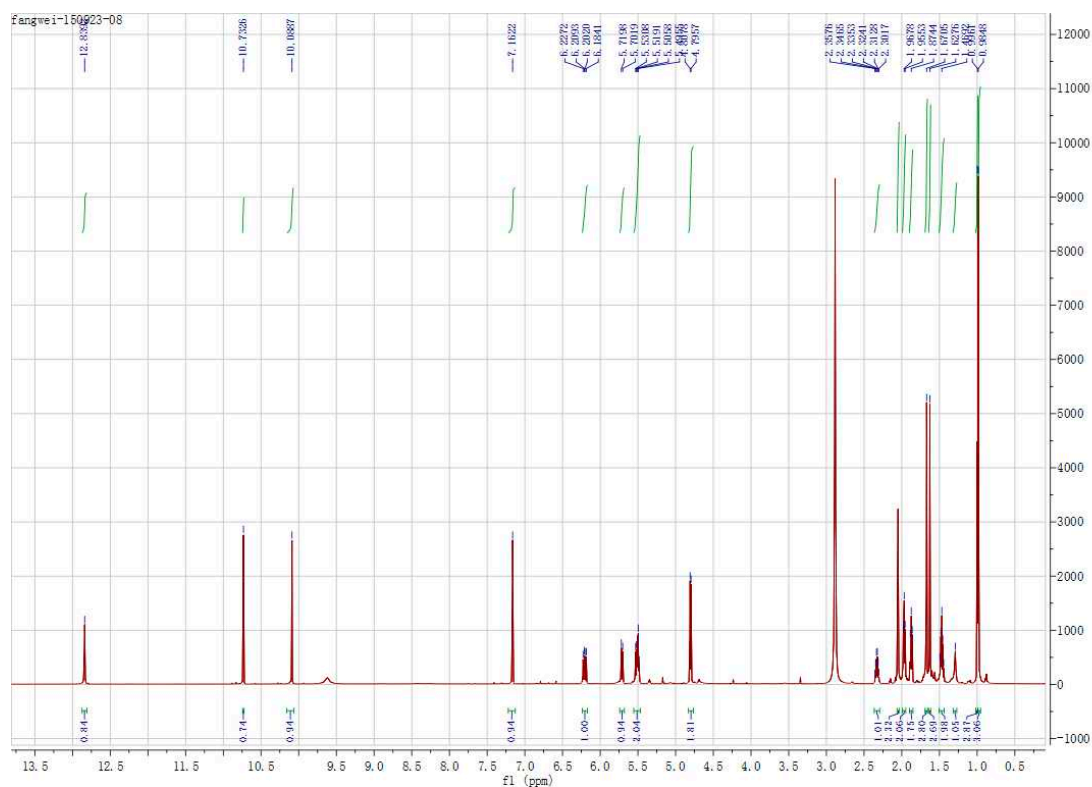

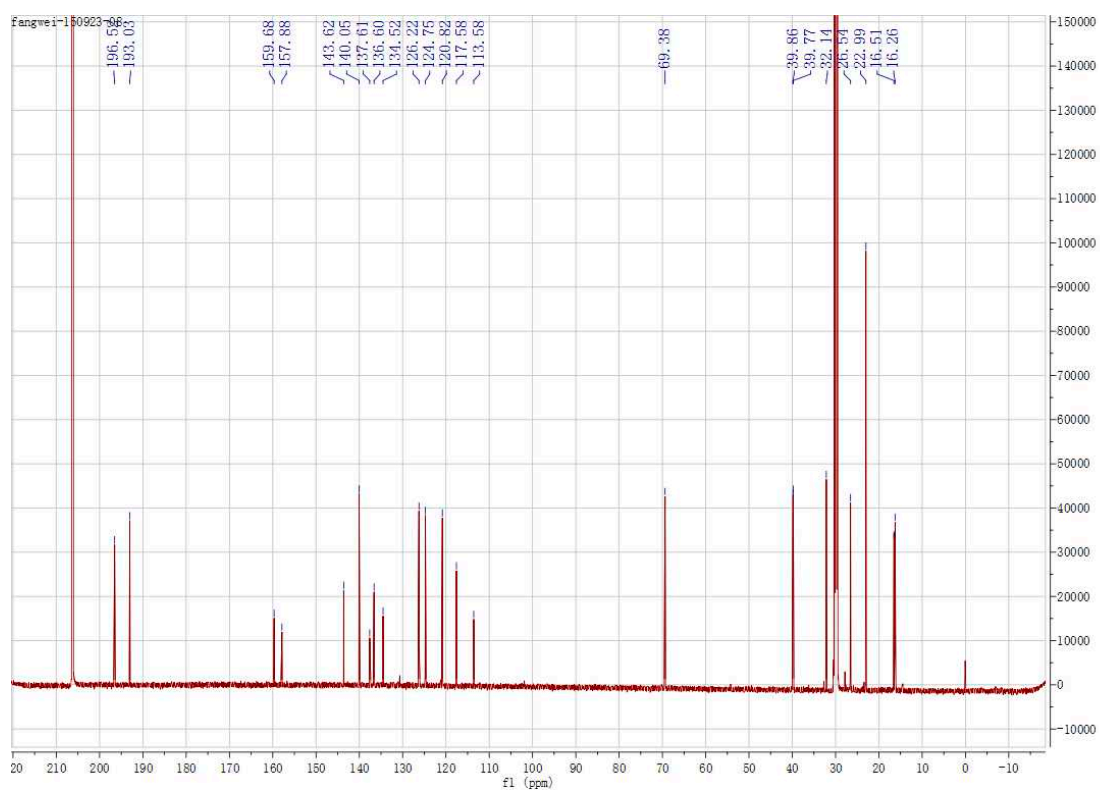

Figure S10  $^{13}\text{C}$ -NMR spectrum of compound 2

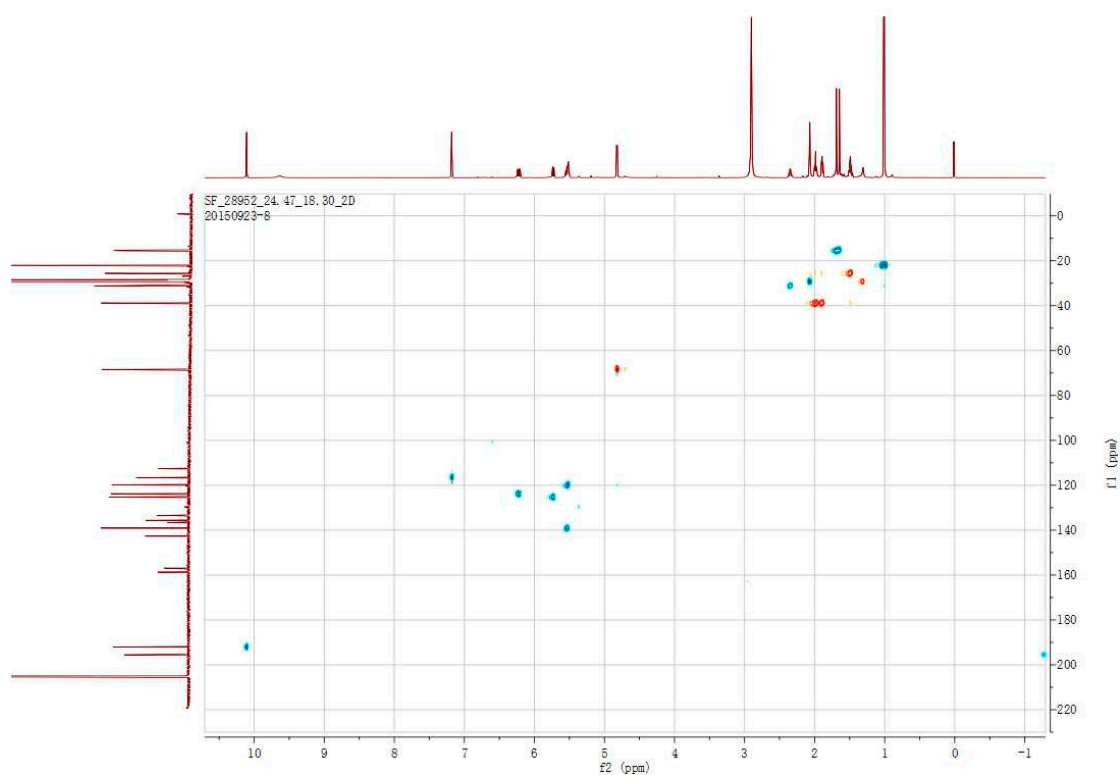

Figure S11  $^1\text{H}$ - $^{13}\text{C}$  HSQC spectrum of compound 2



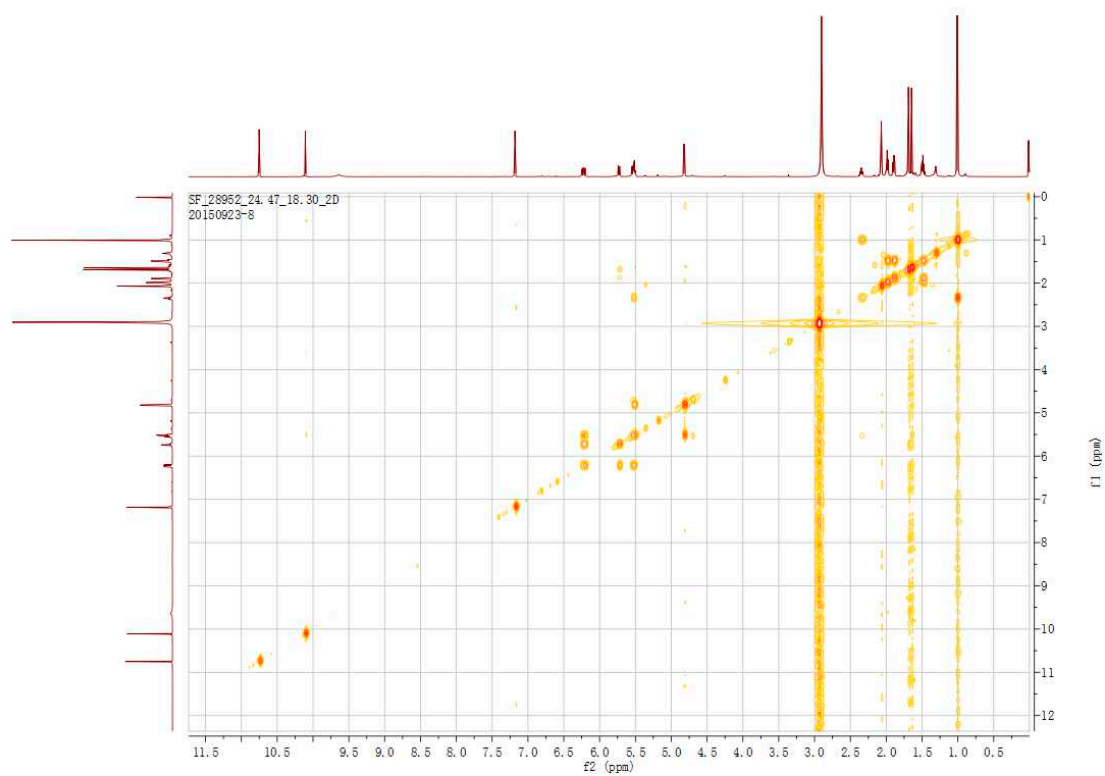

Figure S12  $^1\text{H}$ - $^1\text{H}$  COSY spectrum of compound **2**

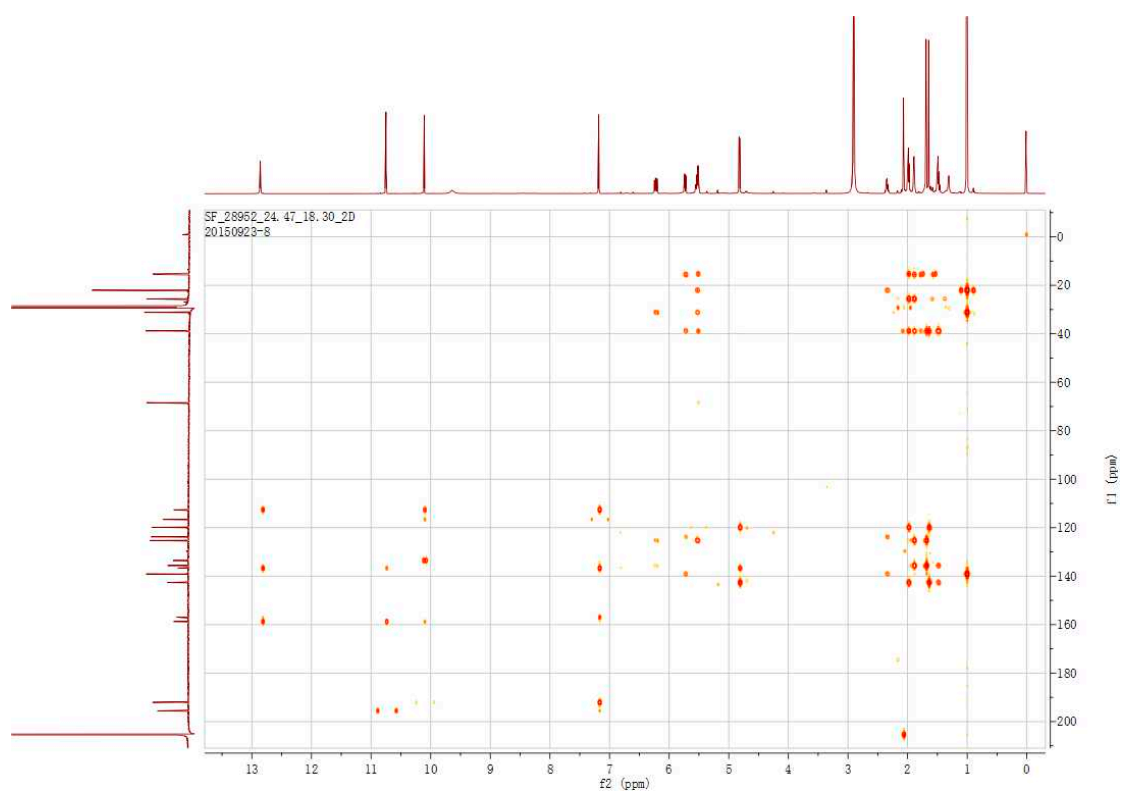

Figure S13  $^1\text{H}$ - $^{13}\text{C}$  HMBC spectrum of compound **2**



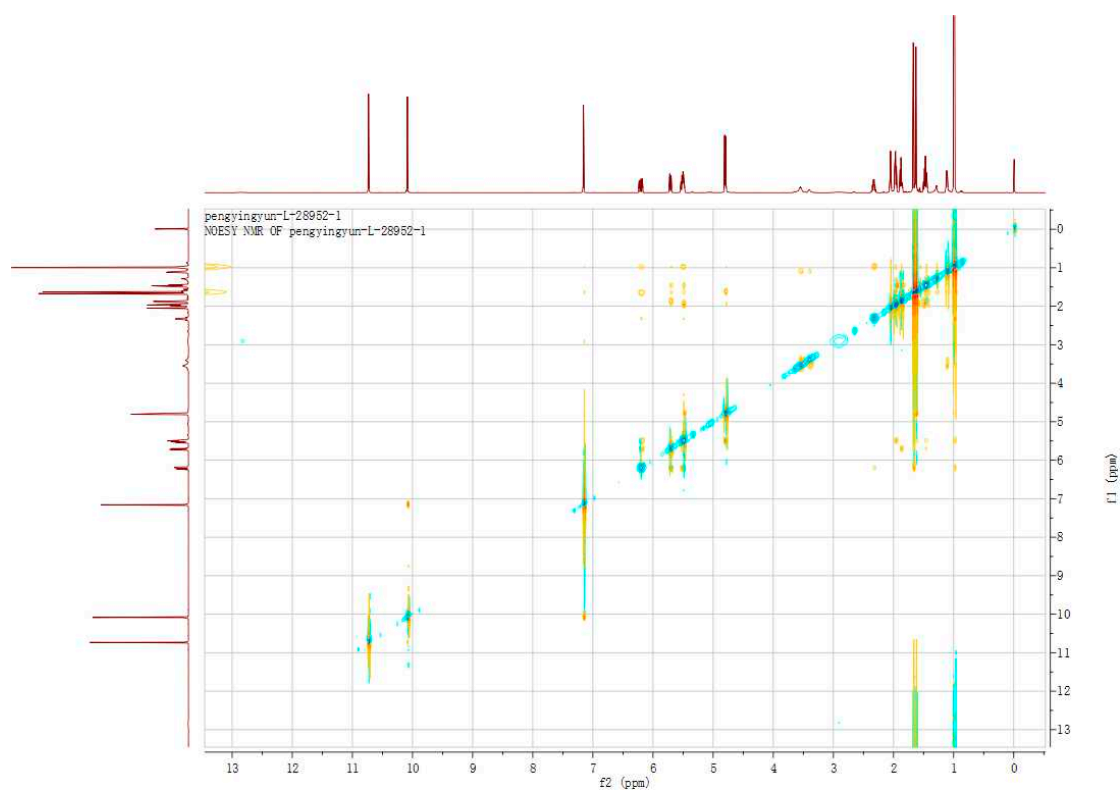

Figure S14  $^1\text{H}$ - $^1\text{H}$  NOESY spectrum of compound 2

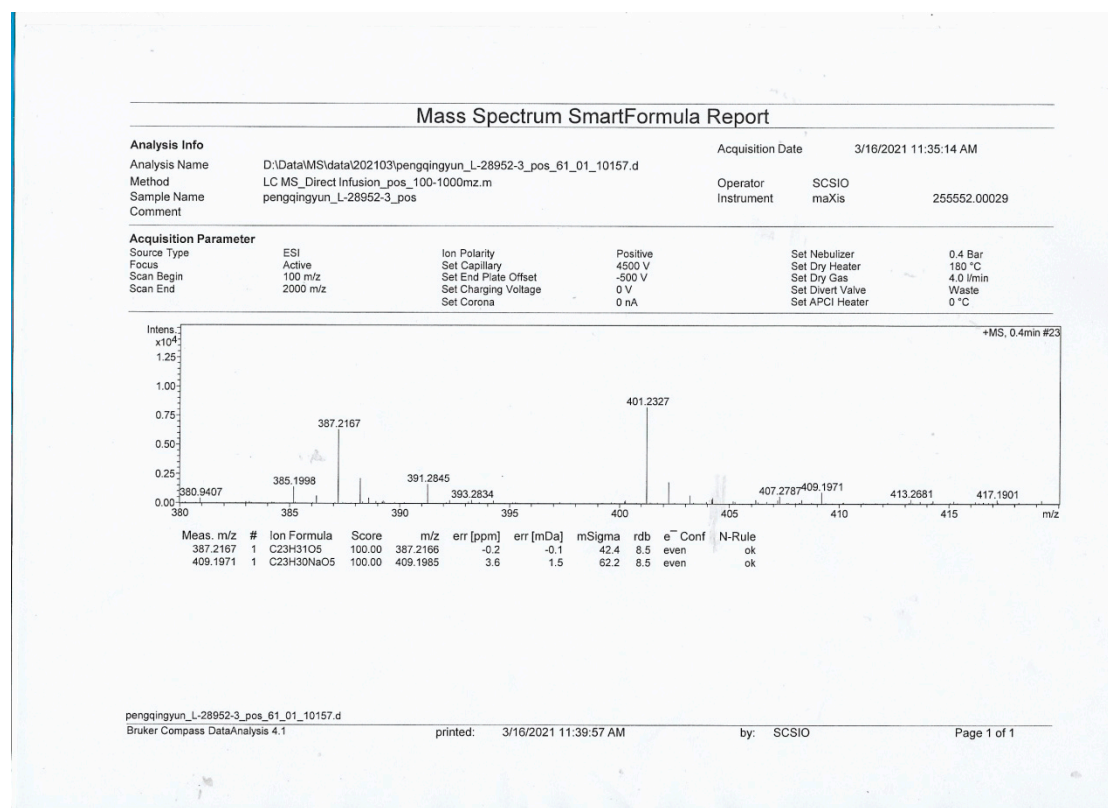

Figure S15 Mass spectrum of compound 3 (determined as  $\text{C}_{23}\text{H}_{30}\text{O}_5$  by HR-ESI-MS:  $m/z$  387.2167,  $[\text{M}+\text{H}]^+$ , calcd for  $\text{C}_{23}\text{H}_{31}\text{O}_5$ , 387.2166)

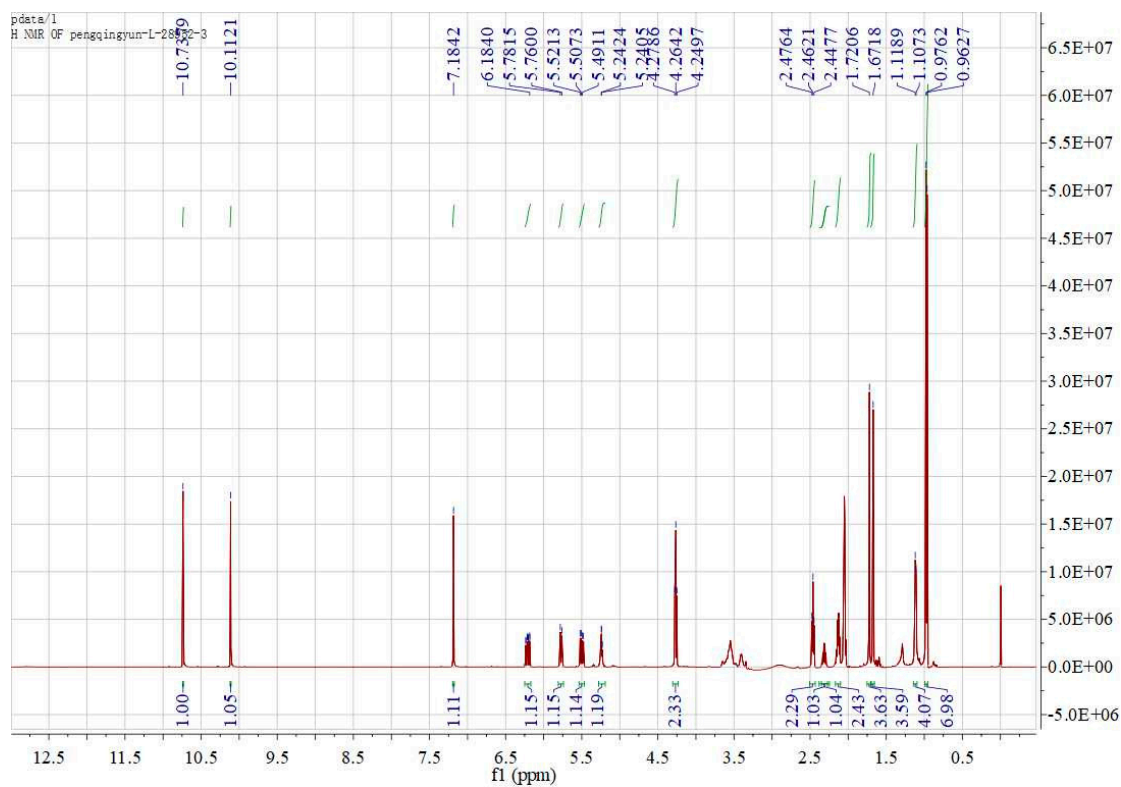

Figure S16  $^1\text{H}$ -NMR spectrum of compound **3**

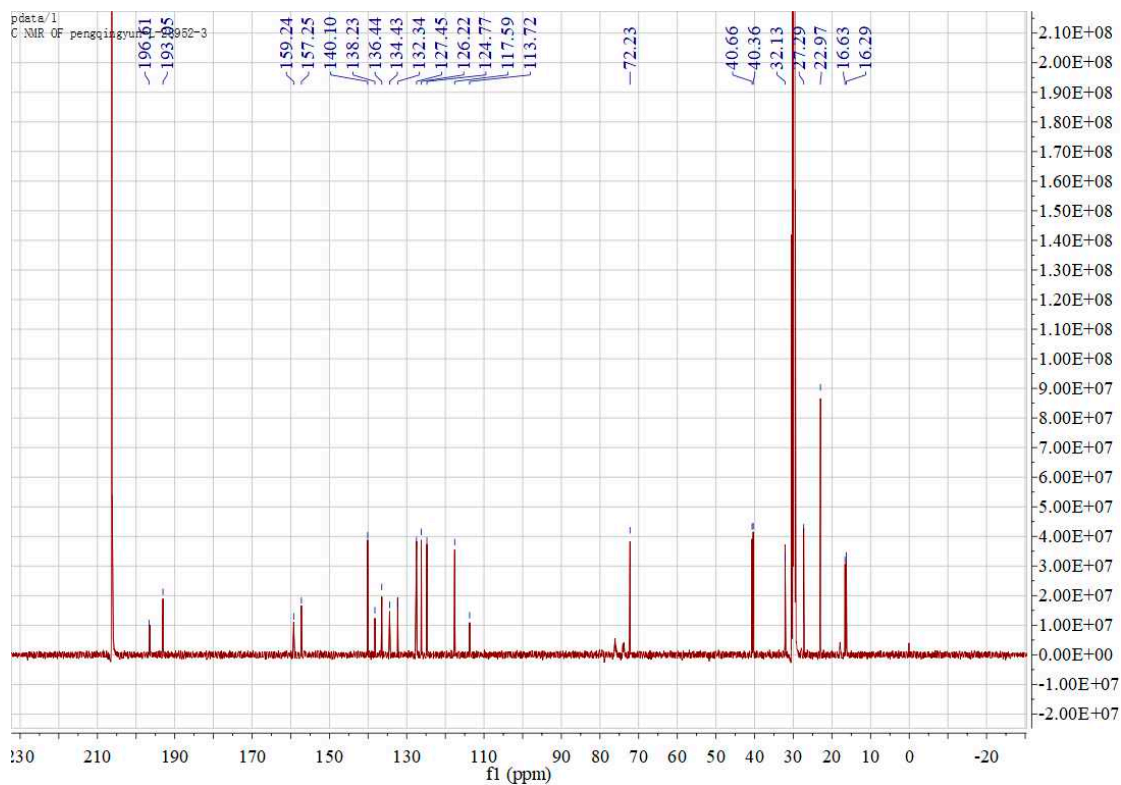

Figure S17  $^{13}\text{C}$ -NMR spectrum of compound **3**

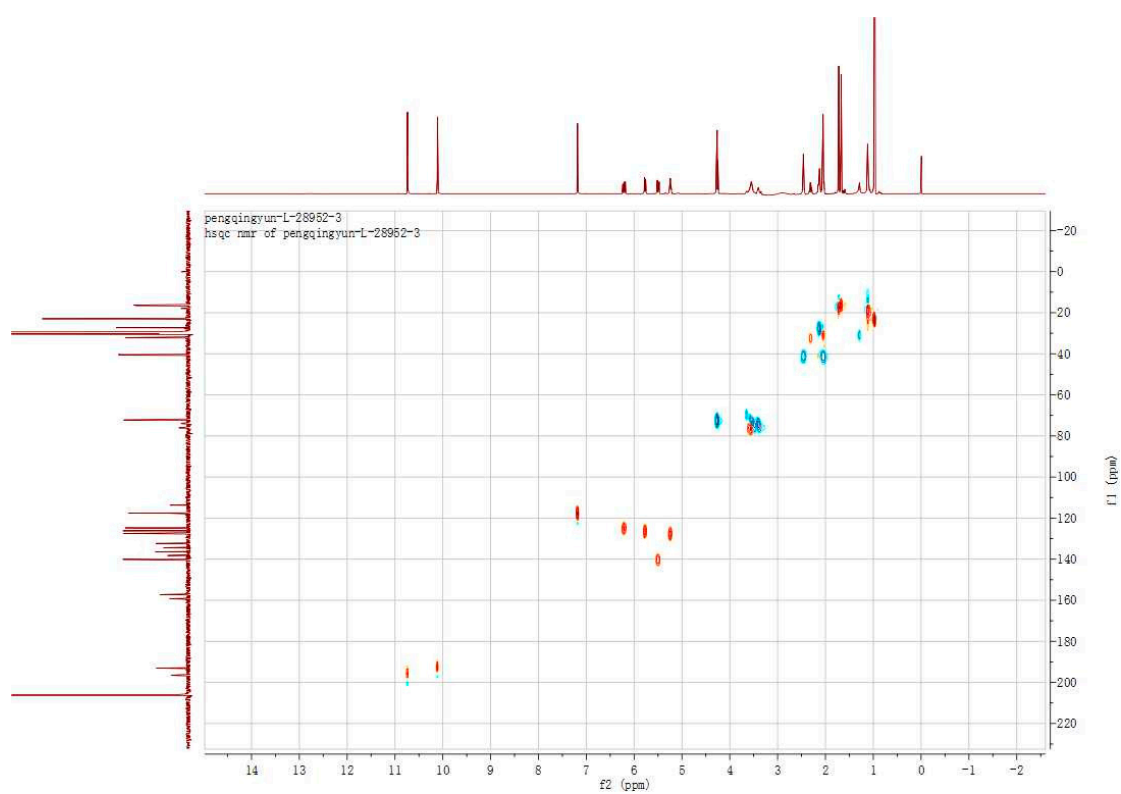

Figure S18  $^1\text{H}$ - $^{13}\text{C}$  HSQC spectrum of compound 3

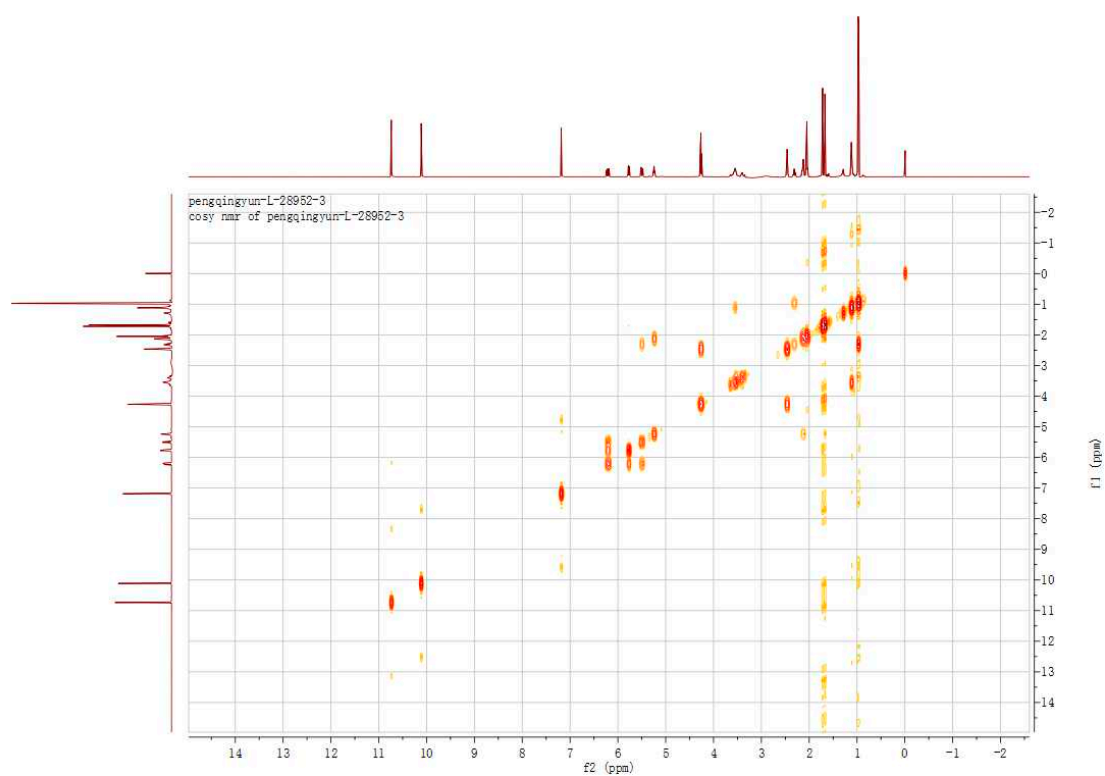

Figure S19  $^1\text{H}$ - $^1\text{H}$  COSY spectrum of compound 3

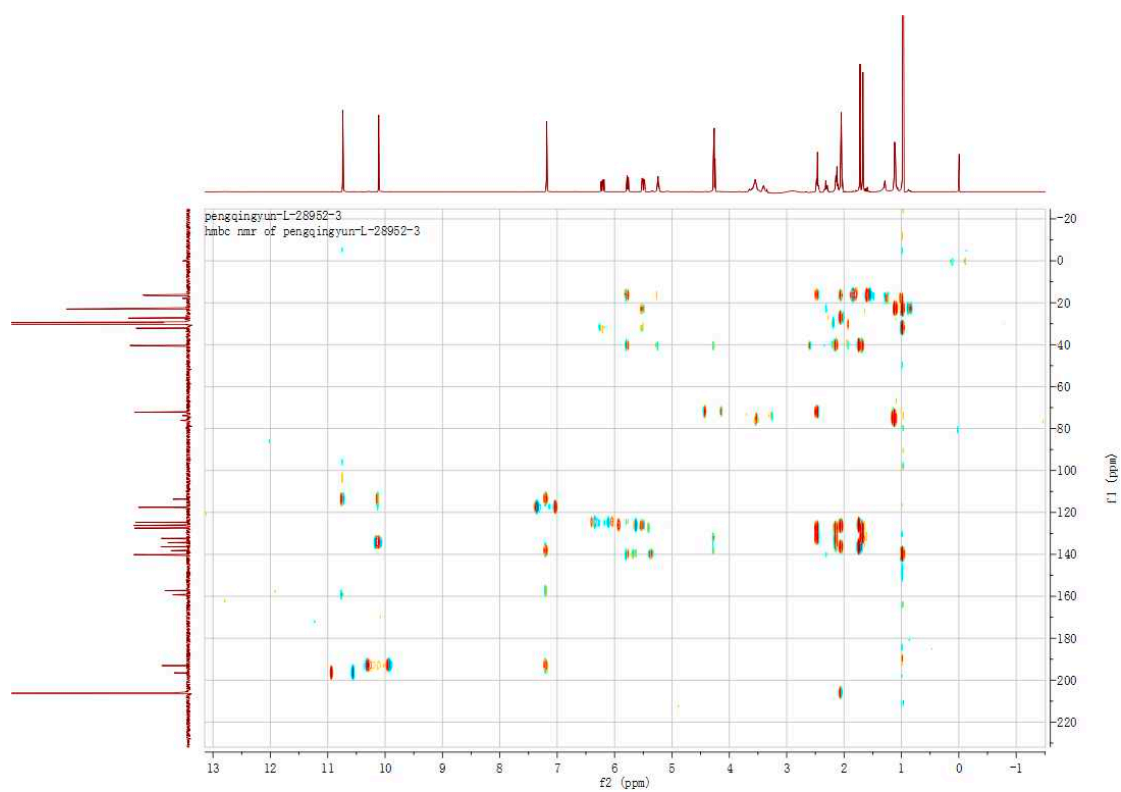

Figure S20  $^1\text{H}$ - $^{13}\text{C}$  HMBC spectrum of compound 3

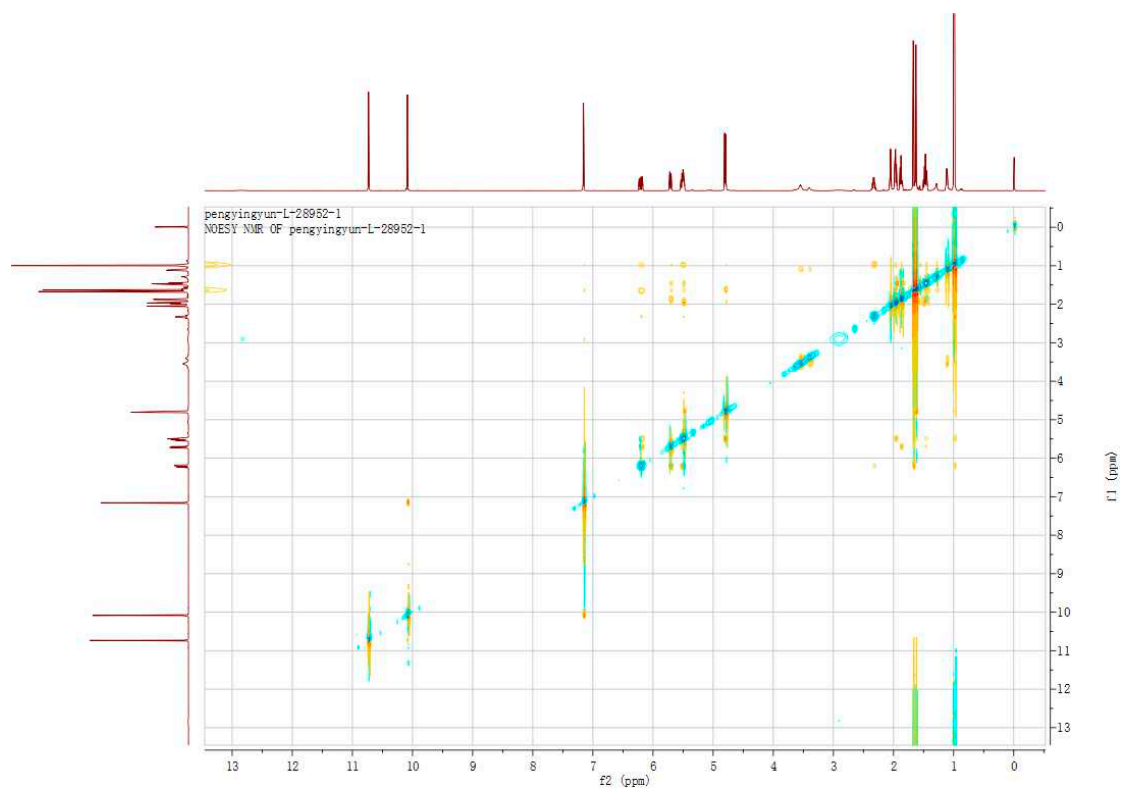

Figure S21  $^1\text{H}$ - $^1\text{H}$  NOESY spectrum of compound 3

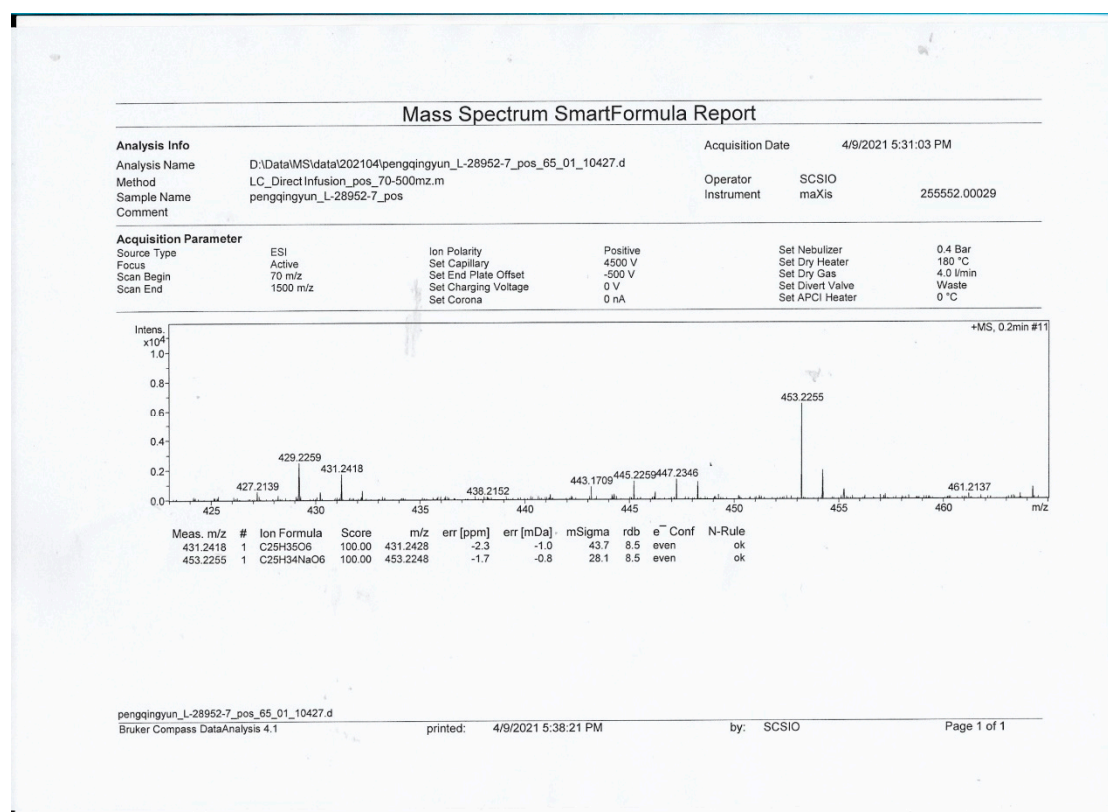

Figure S22 Mass spectrum of compound **4** (determined as C<sub>25</sub>H<sub>34</sub>O<sub>6</sub> by HR-ESI-MS: *m/z* 453.2255, [M+Na]<sup>+</sup>, calcd for C<sub>25</sub>H<sub>34</sub>NaO<sub>6</sub>, 453.2248)

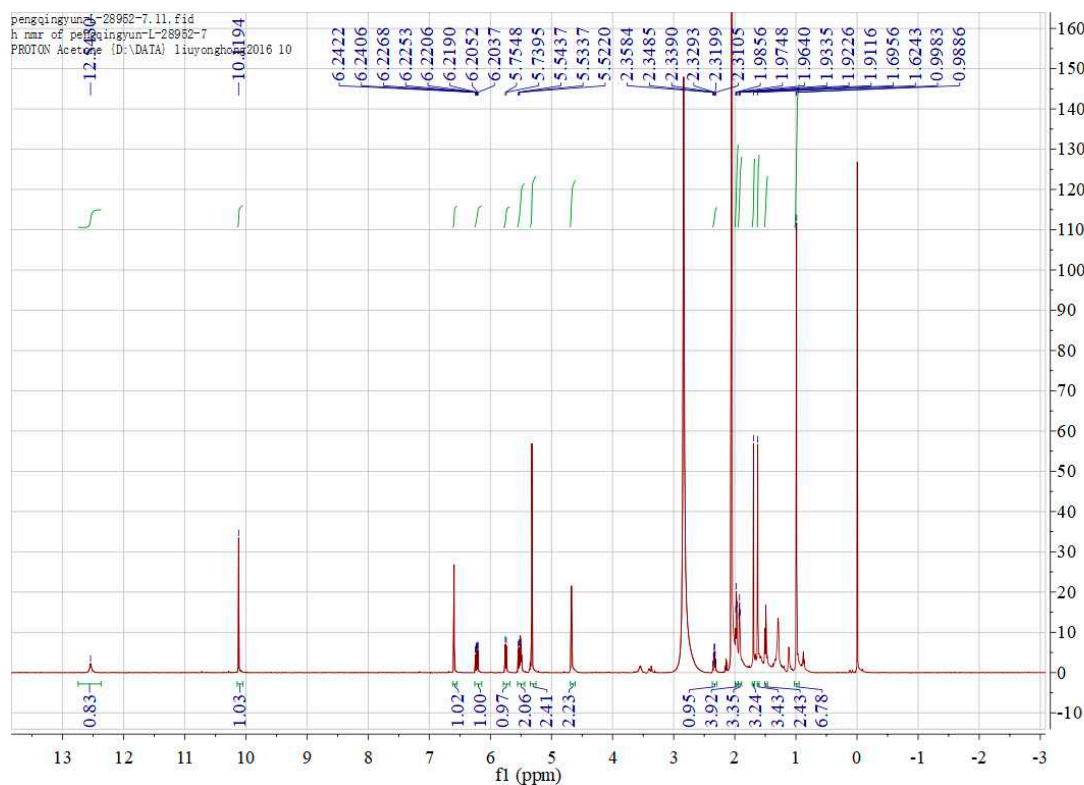

Figure S23 <sup>1</sup>H-NMR spectrum of compound **4**

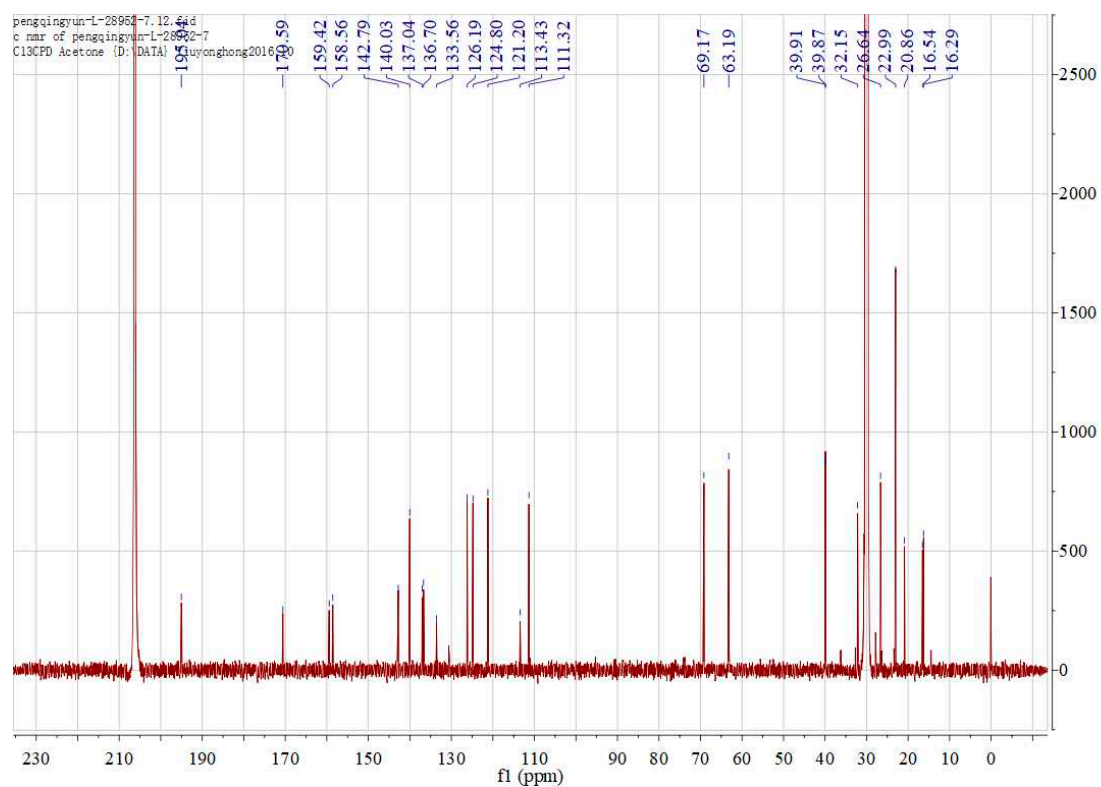

Figure S24  $^{13}\text{C}$ -NMR spectrum of compound **4**

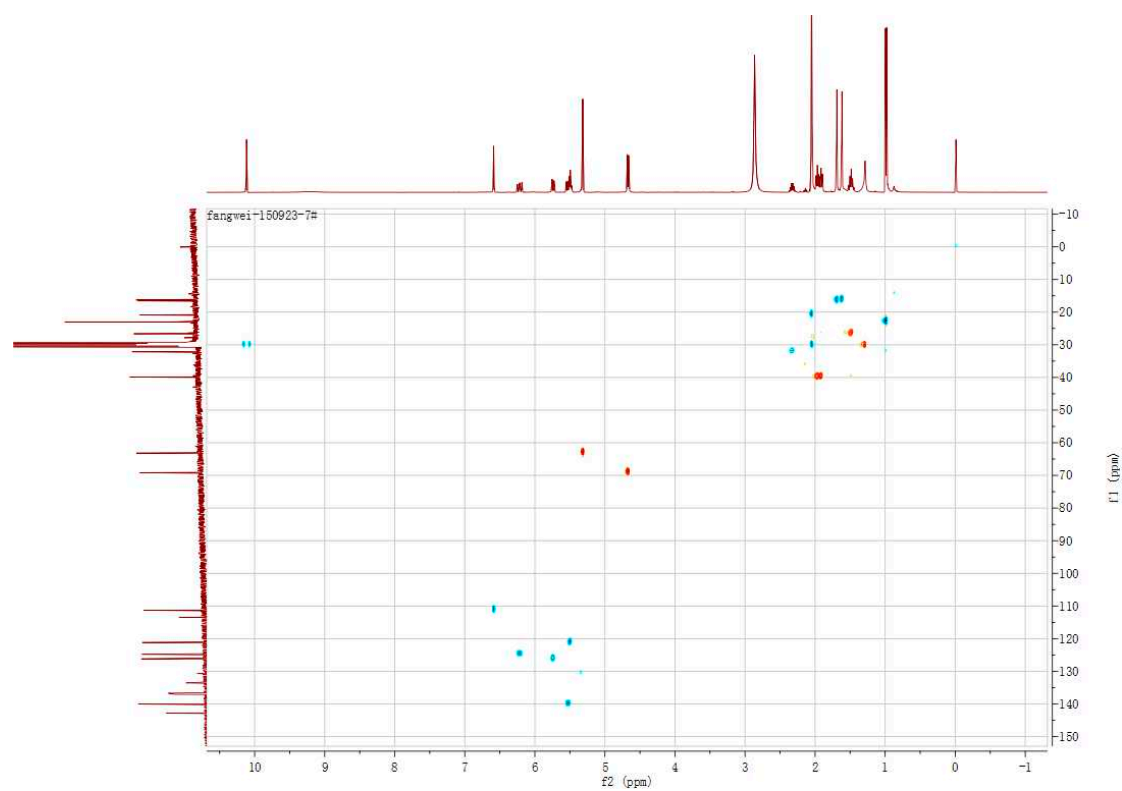

Figure S25  $^1\text{H}$ - $^{13}\text{C}$  HSQC spectrum of compound **4**



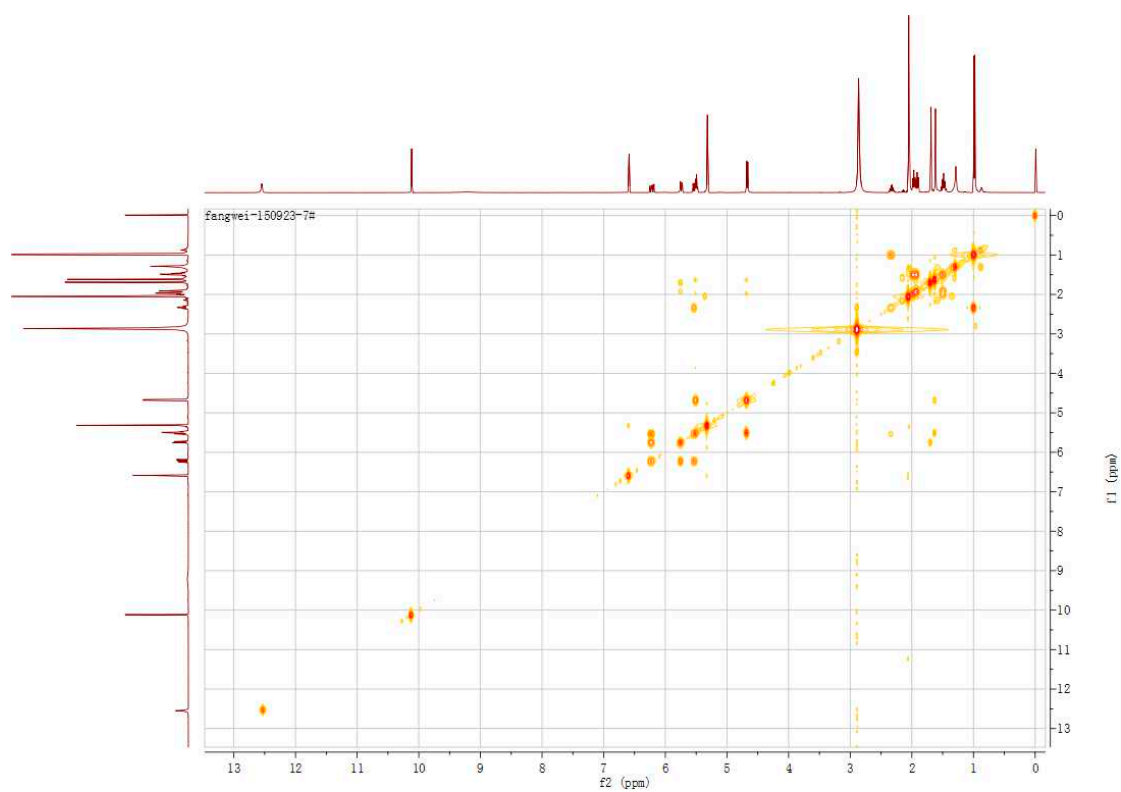

Figure S26  $^1\text{H}$ - $^1\text{H}$  COSY spectrum of compound **4**

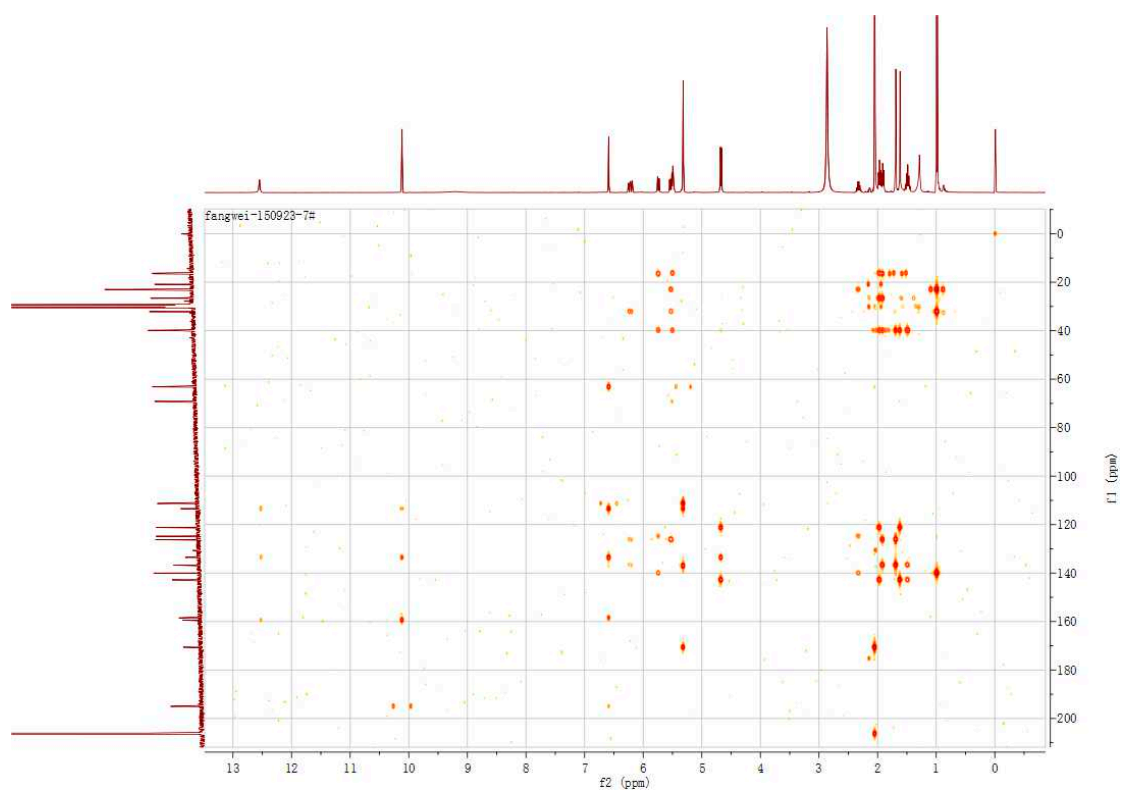

Figure S27  $^1\text{H}$ - $^{13}\text{C}$  HMBC spectrum of compound **4**



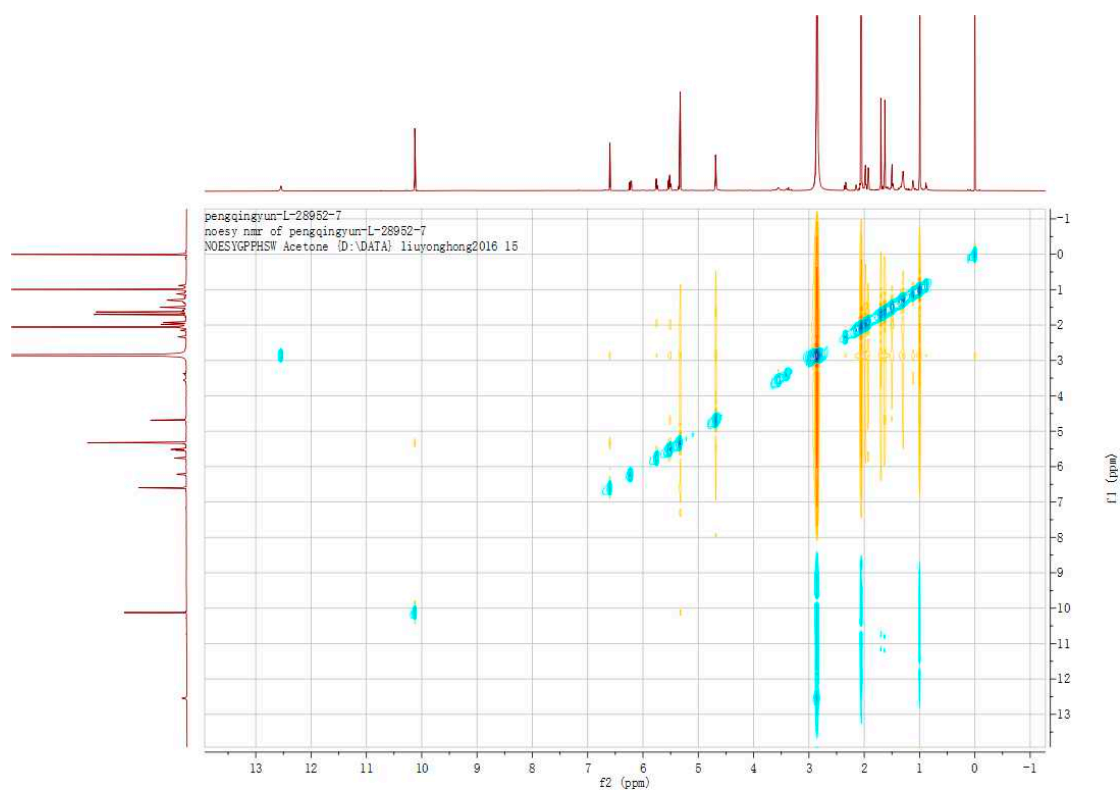

Figure S28  $^1\text{H}$ - $^1\text{H}$  NOESY spectrum of compound **4**

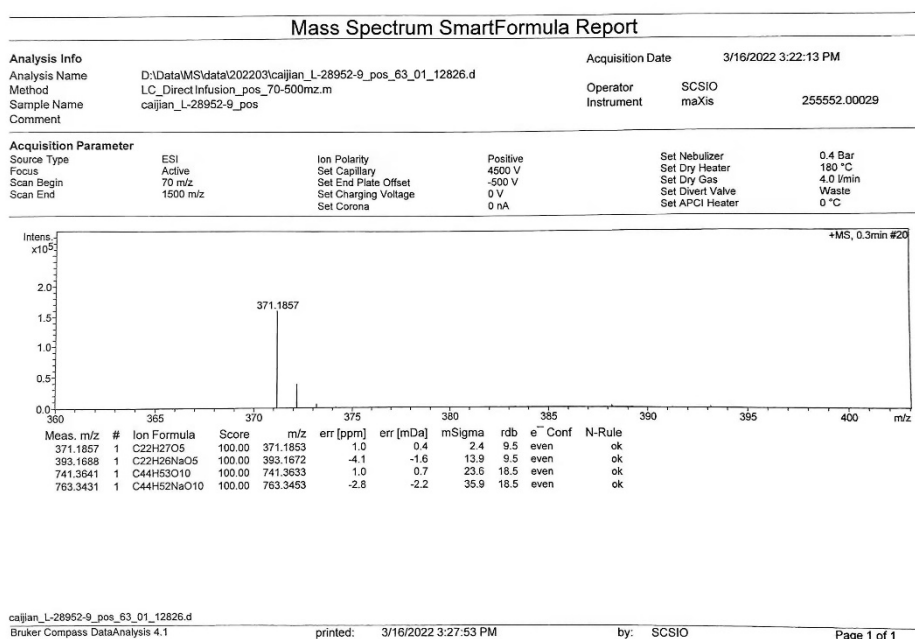

Figure S29 Mass spectrum of compound **5** (determined as  $\text{C}_{22}\text{H}_{26}\text{O}_5$  by HR-ESI-MS:  $m/z$  371.1857,  $[\text{M}+\text{Na}]^+$ , calcd for  $\text{C}_{22}\text{H}_{27}\text{O}_5$ , 371.1853)

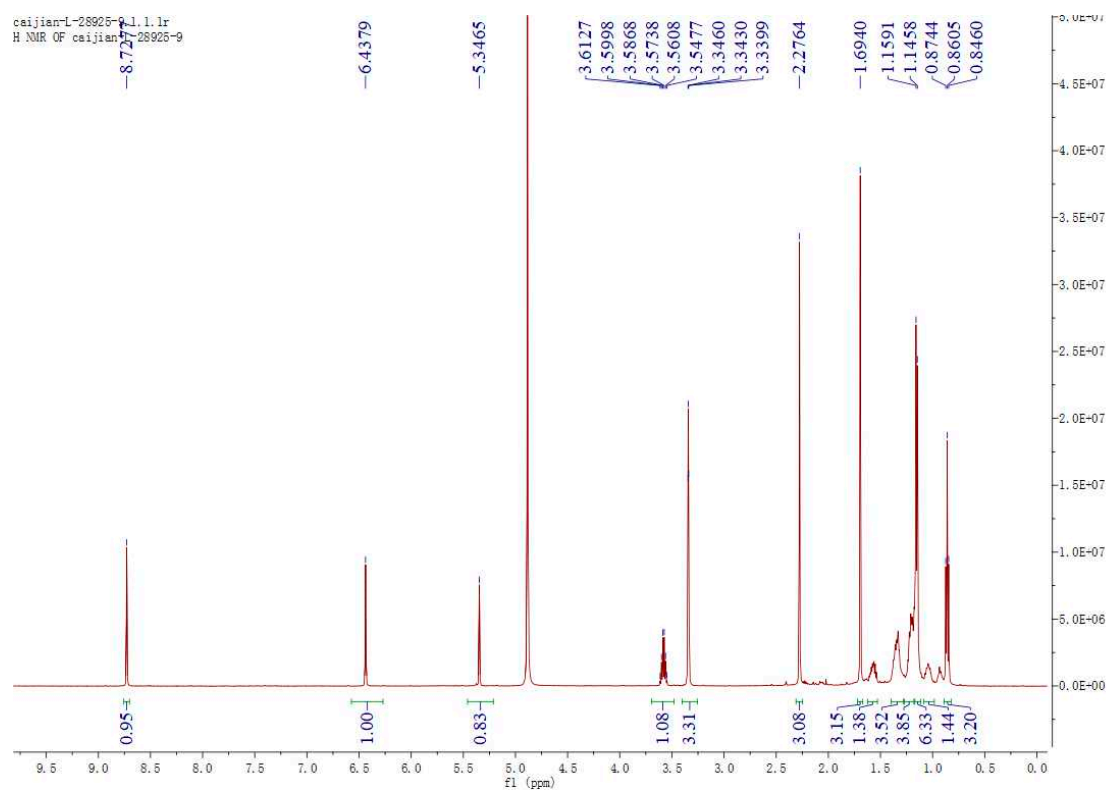

Figure S30  $^1\text{H}$ -NMR spectrum of compound **5**

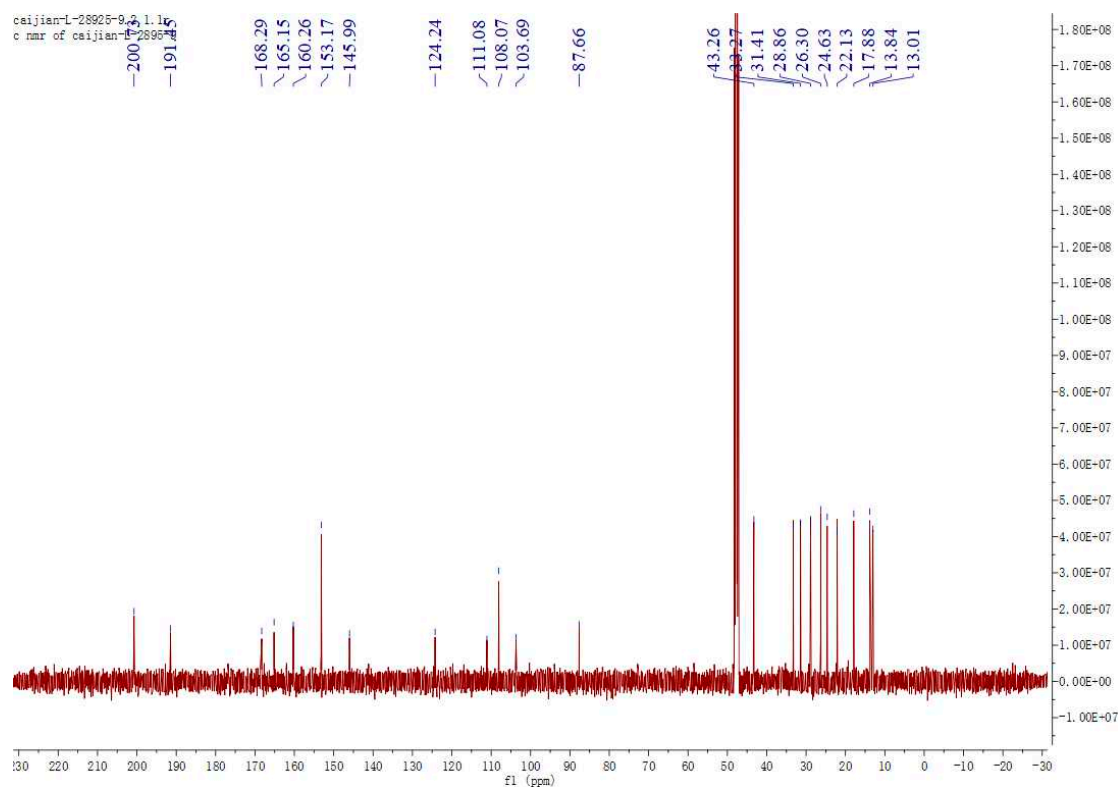

Figure S31  $^{13}\text{C}$ -NMR spectrum of compound **5**

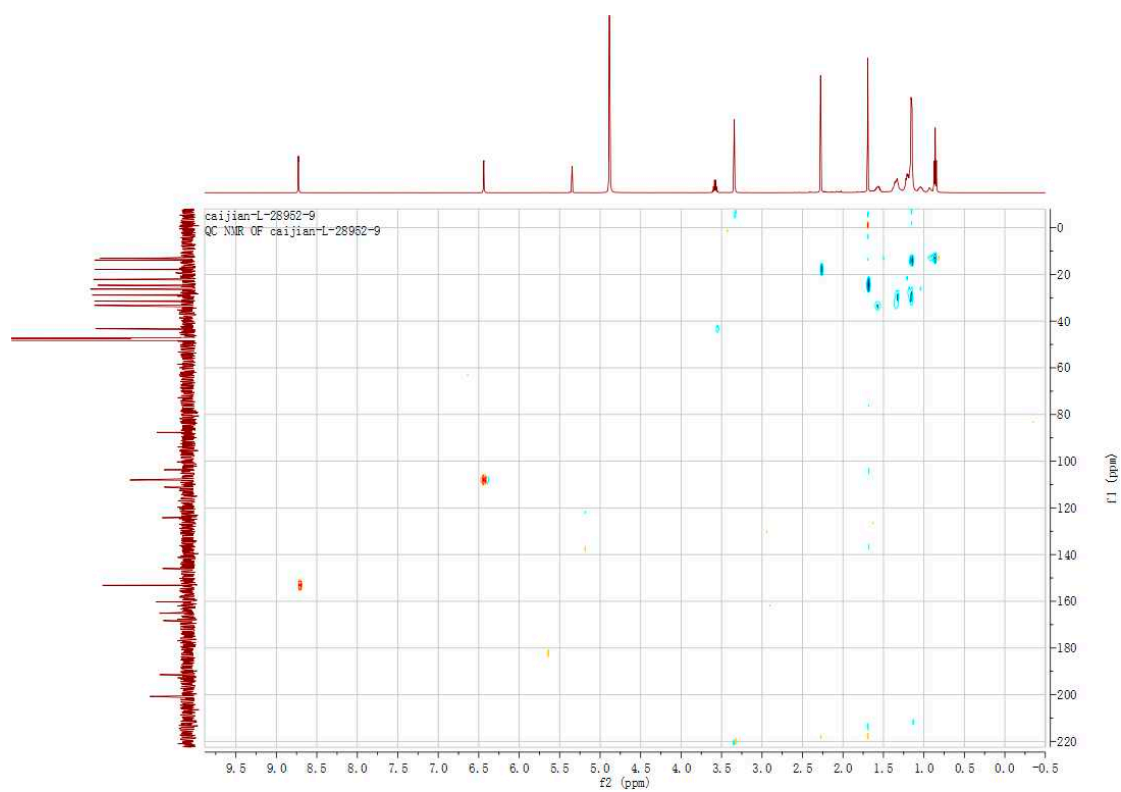

Figure S32  $^1\text{H}$ - $^{13}\text{C}$  HSQC spectrum of compound **5**

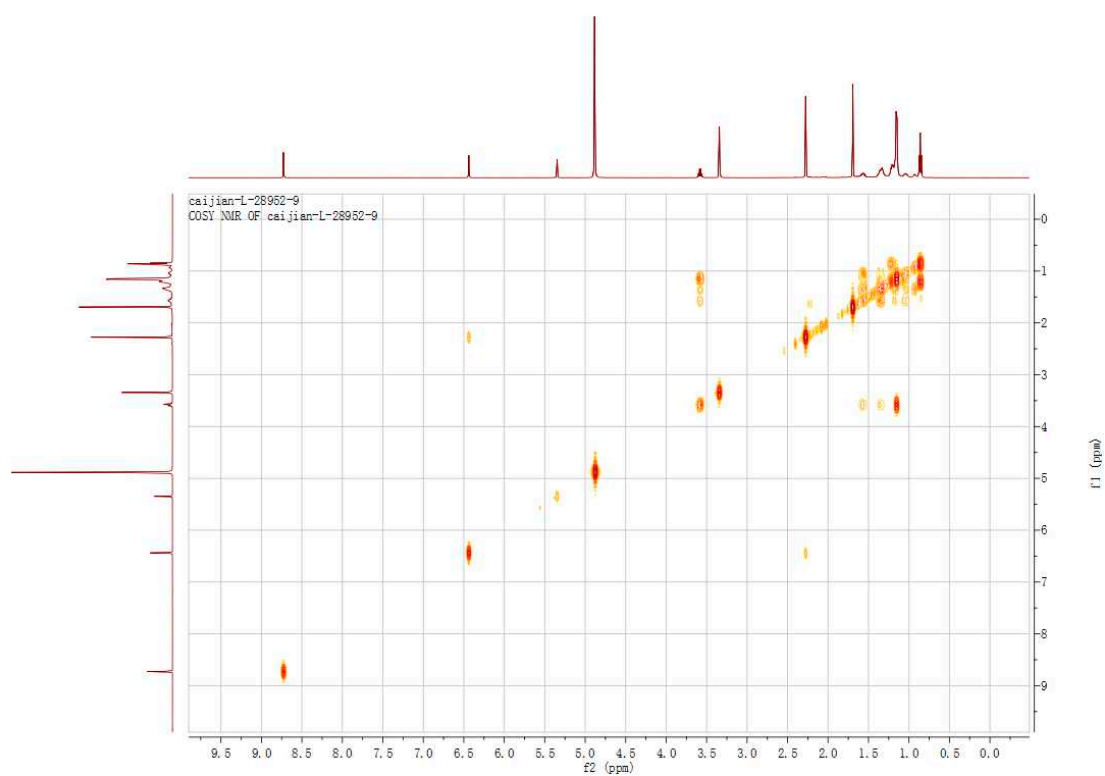

Figure S33  $^1\text{H}$ - $^1\text{H}$  COSY spectrum of compound **5**

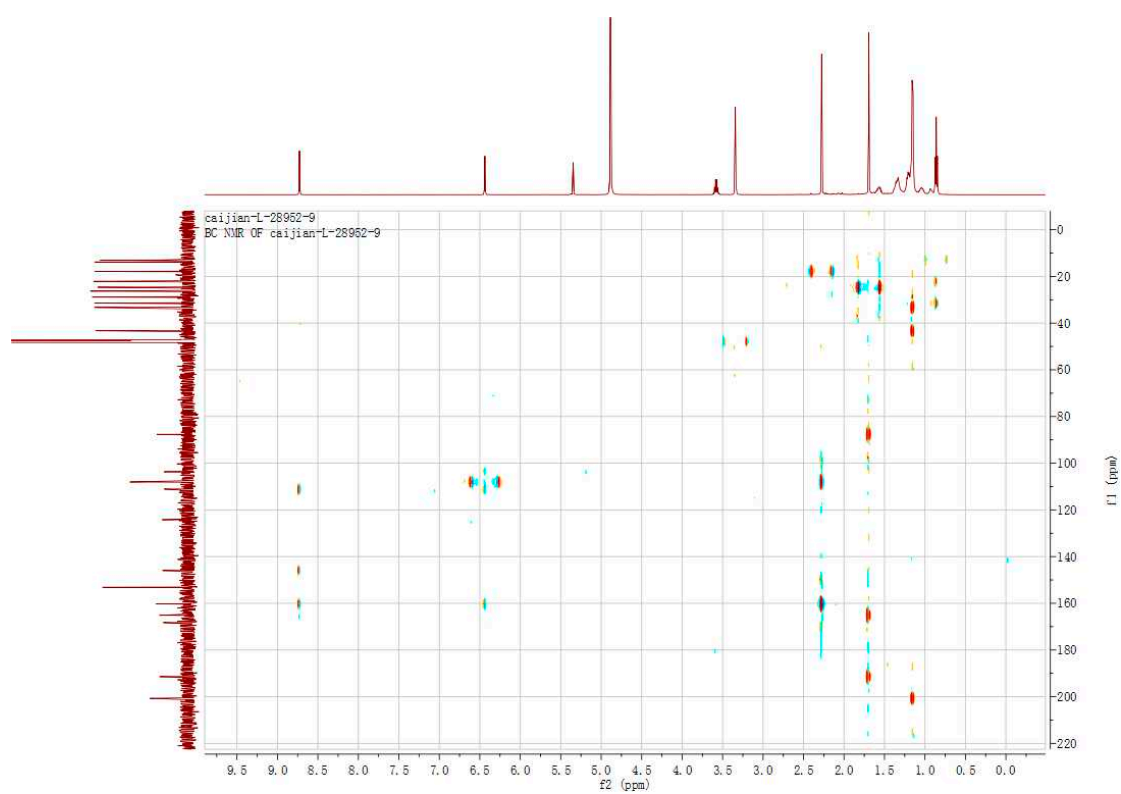

Figure S34  $^1\text{H}$ - $^{13}\text{C}$  HMBC spectrum of compound **5**
